# Supplementary material
Source: publisher figshare collection journal article supplement (https://gsajournals.figshare.com/articles/dataset/_/8230757)

Figure S13

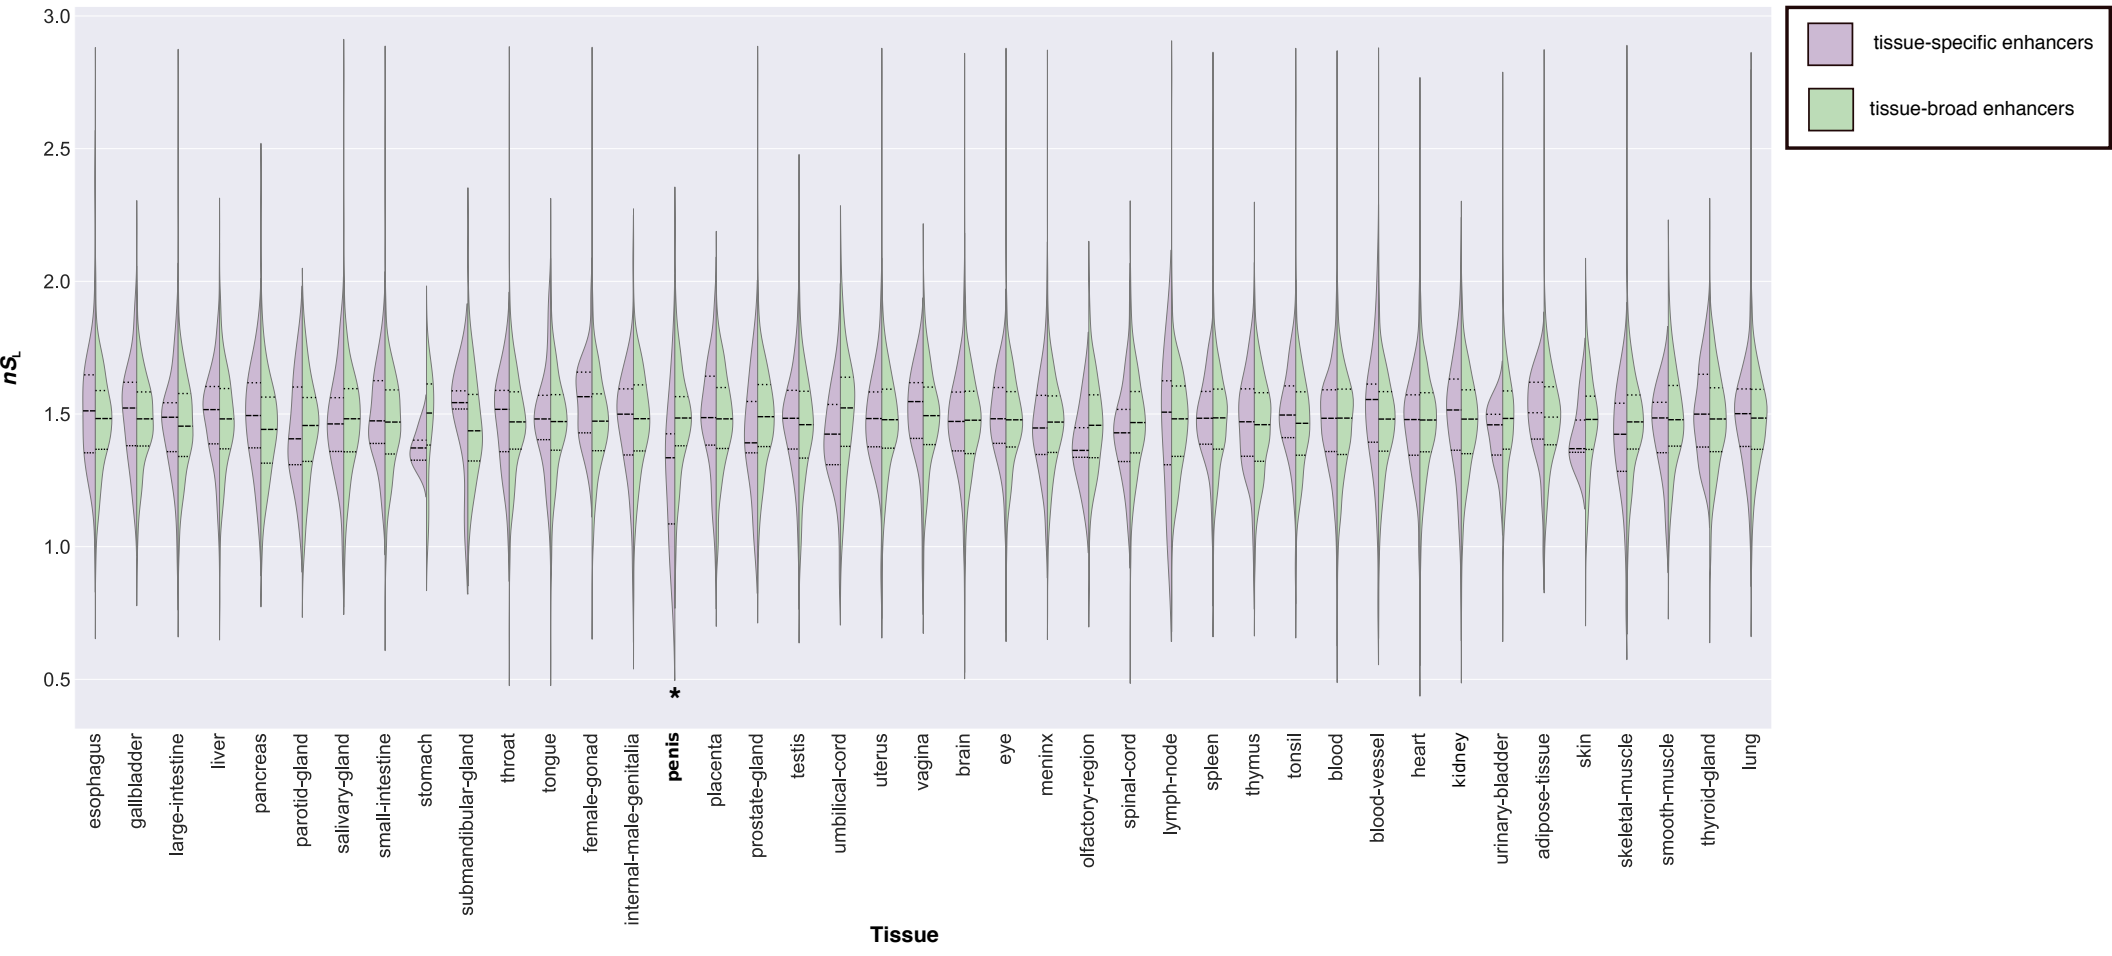

Supplement: Supplementary file 1 [file 1]

Figure S5

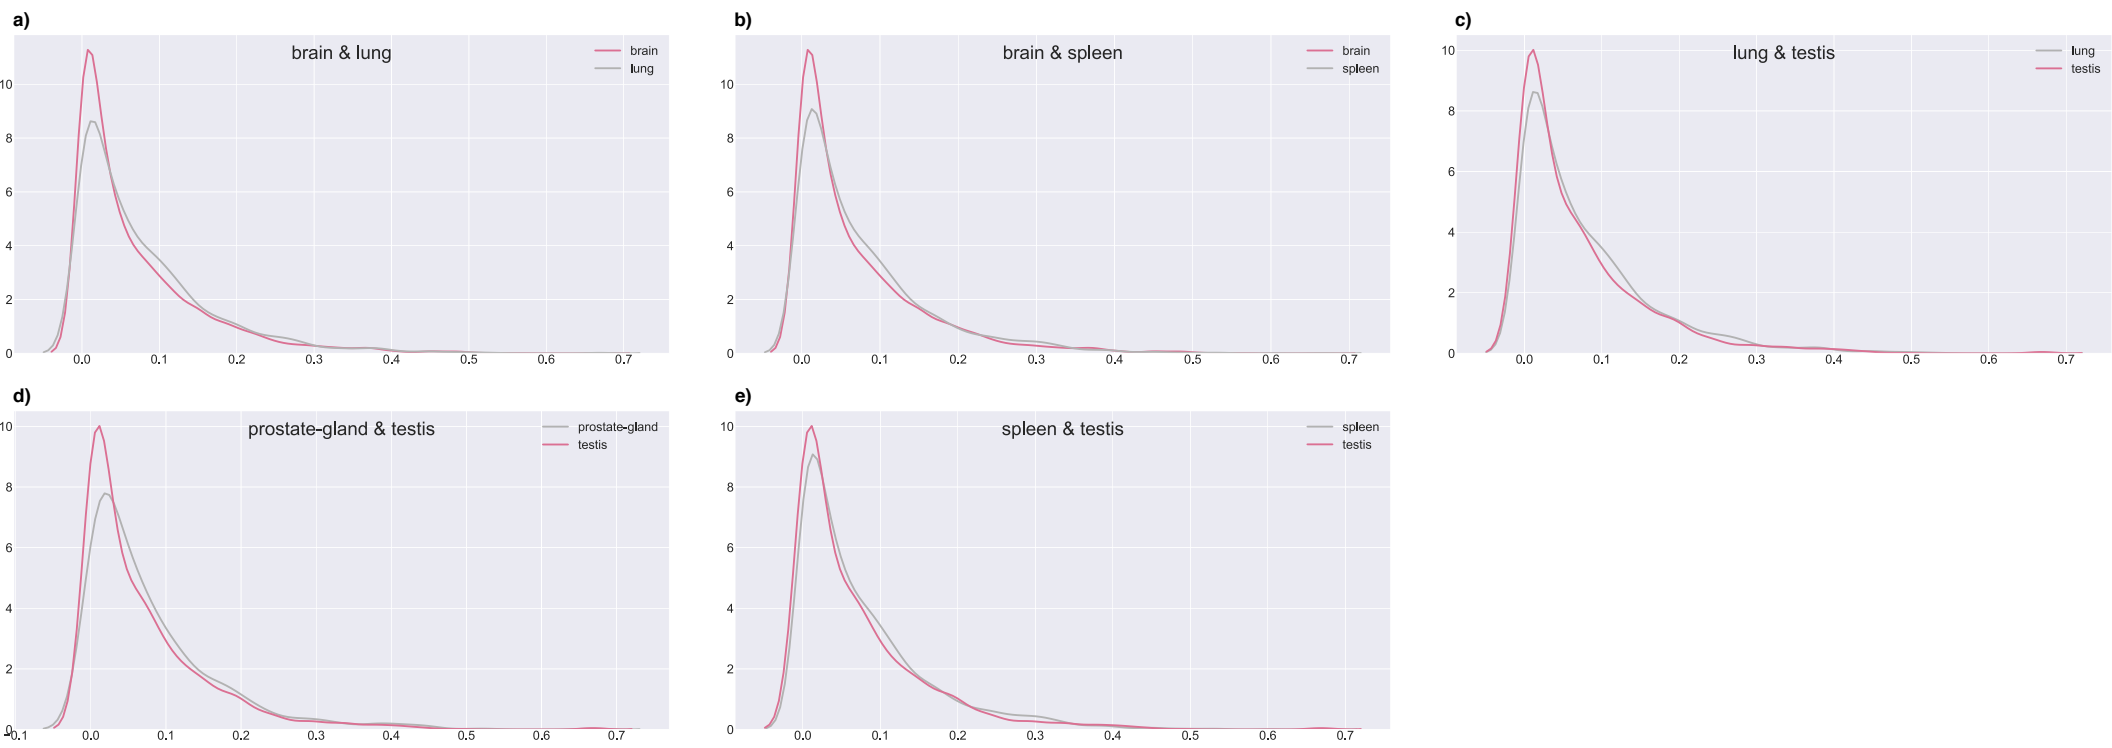

Supplement: Supplementary file 3 [file 1]

Figure S9

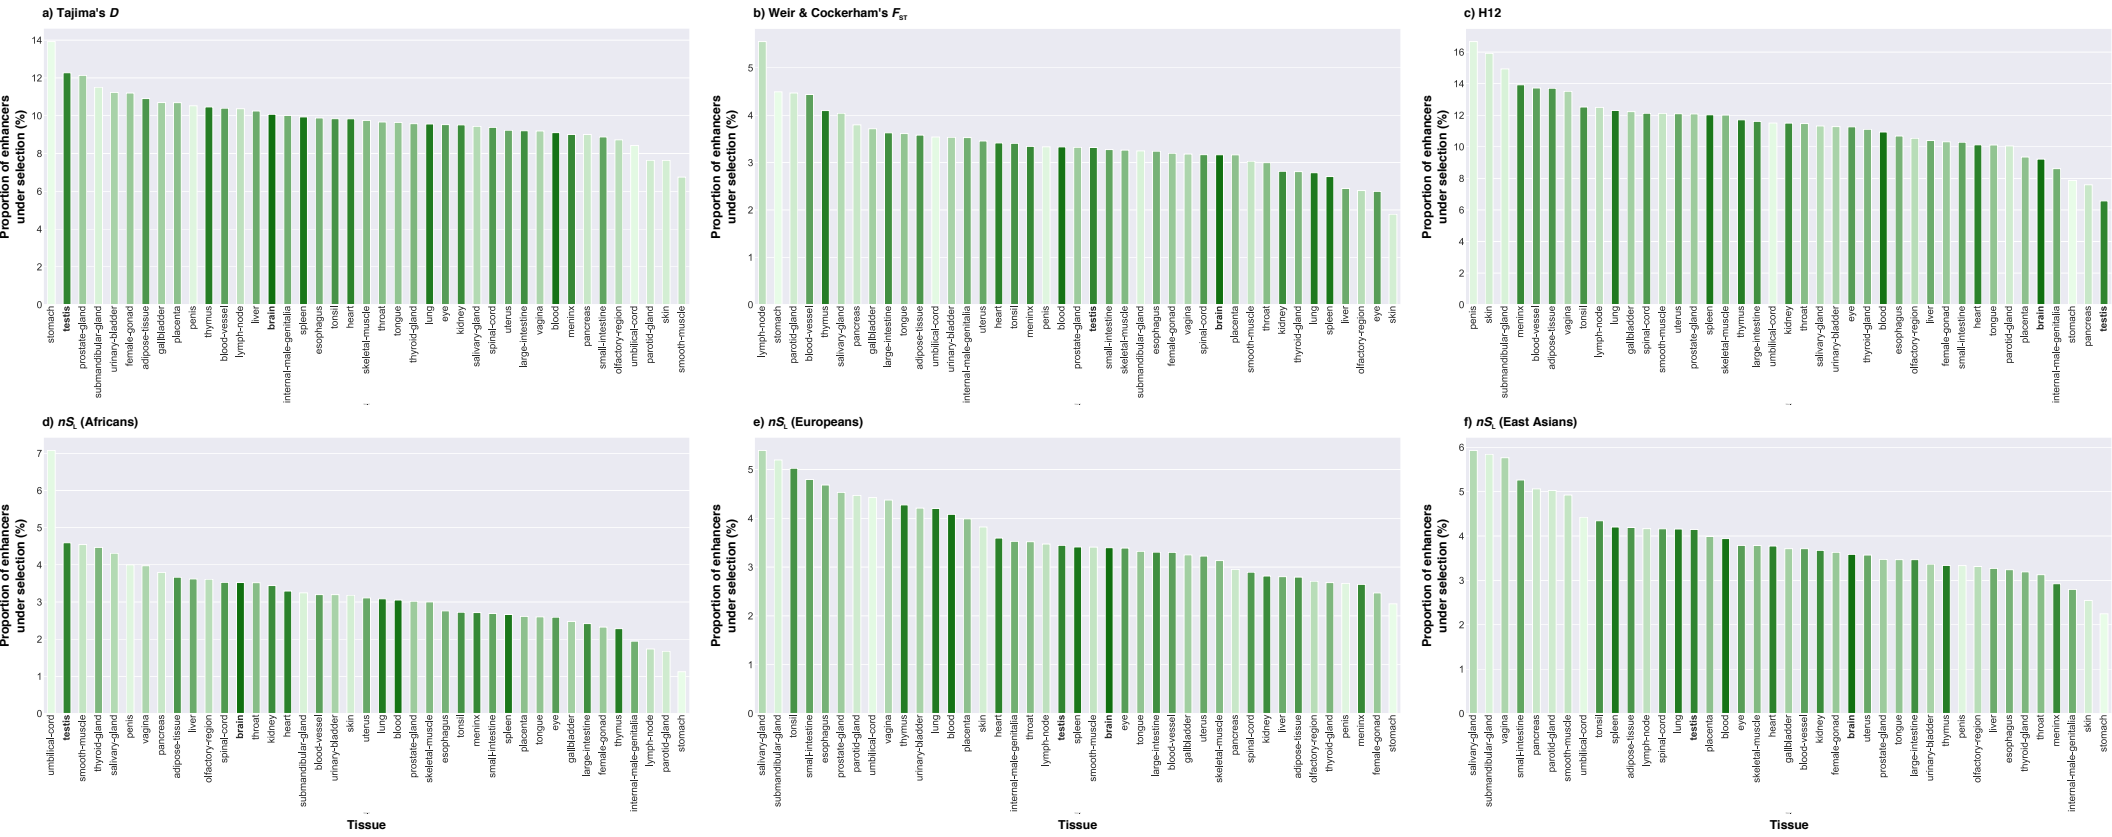

Supplement: Supplementary file 4 [file 1]

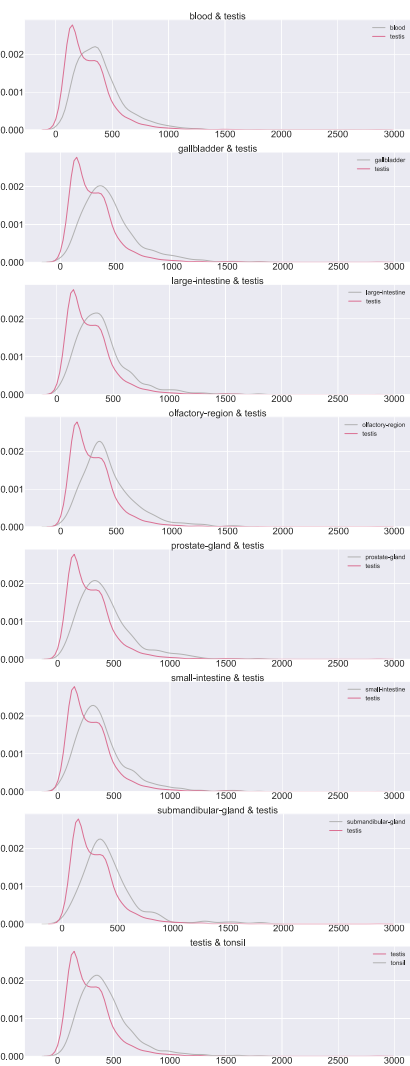

Supplement: Supplementary file 5 [file 1]

Figure S12

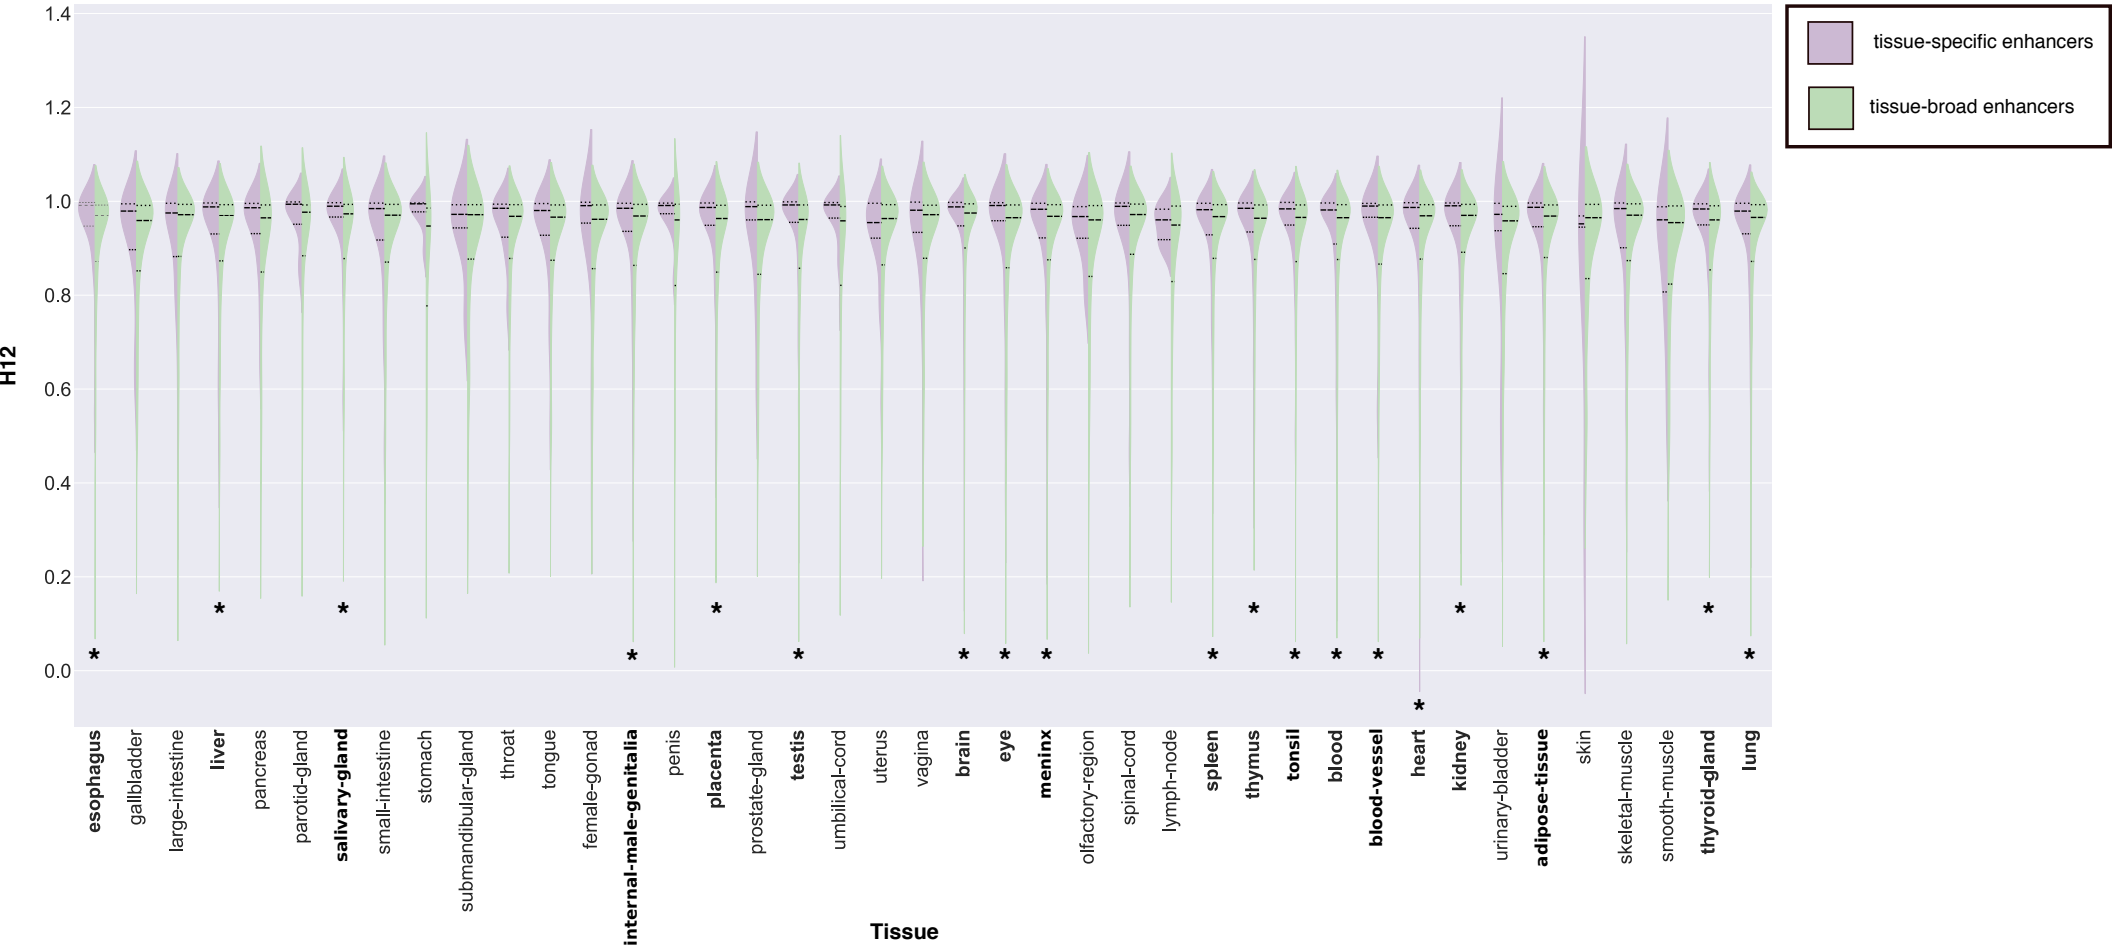

Supplement: Supplementary file 6 [file 1]

Figure S10

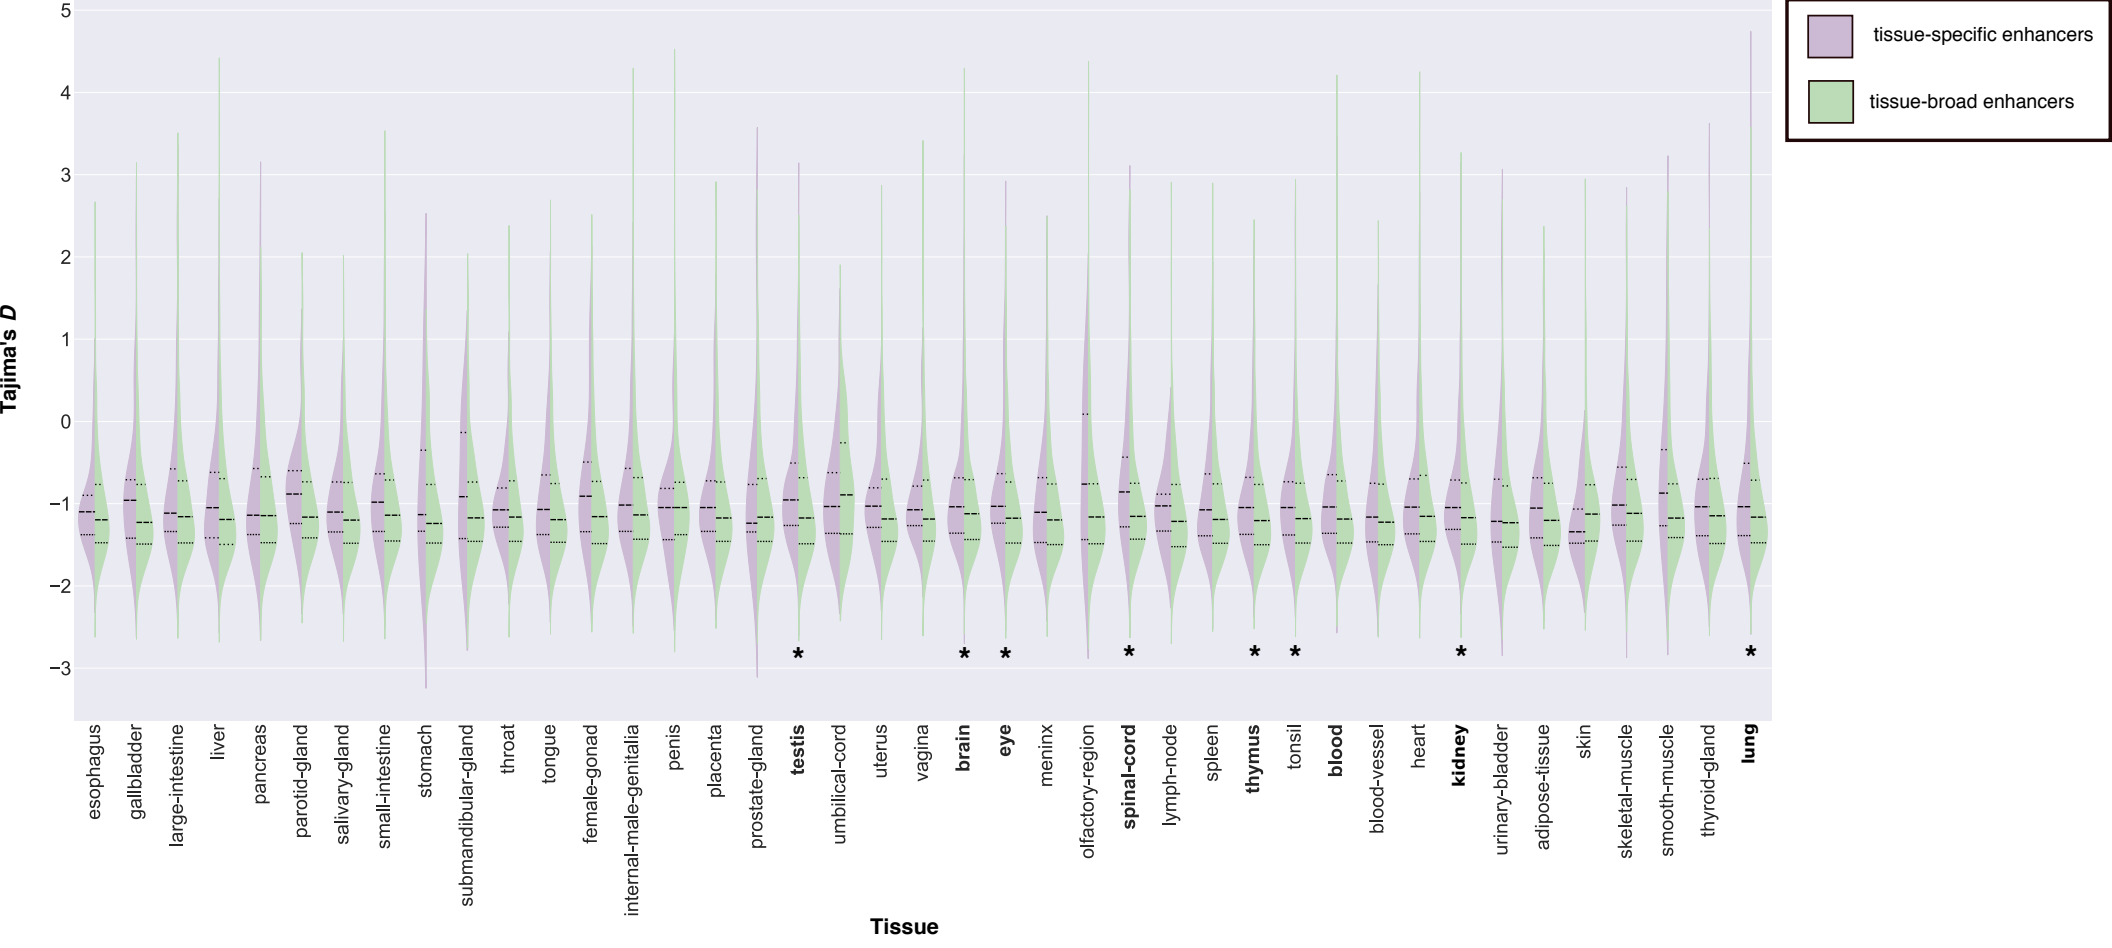

Supplement: Supplementary file 7 [file 1]

Figure S1

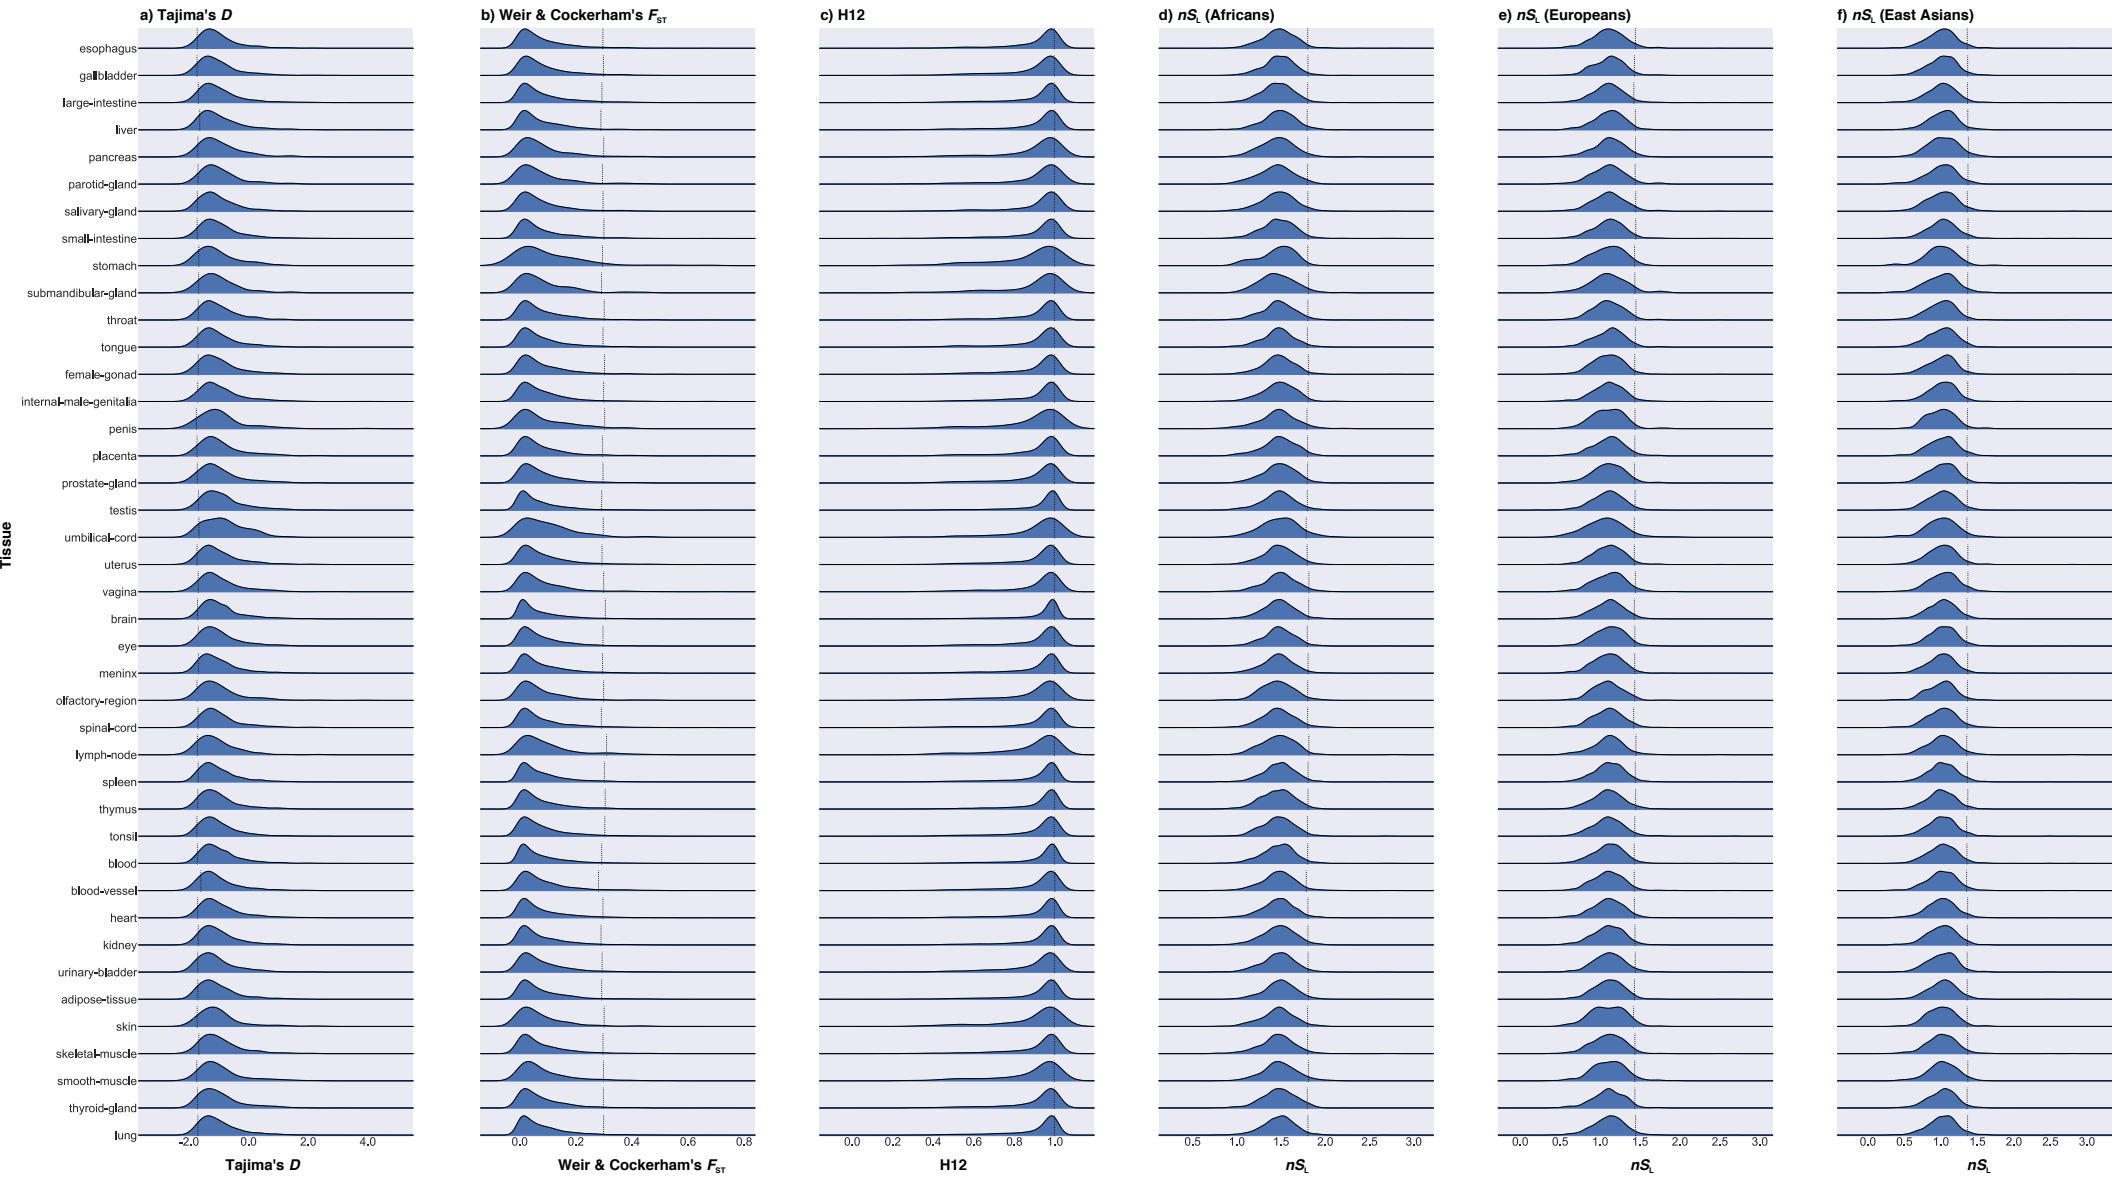

Supplement: Supplementary file 8 [file 1]

Figure S2

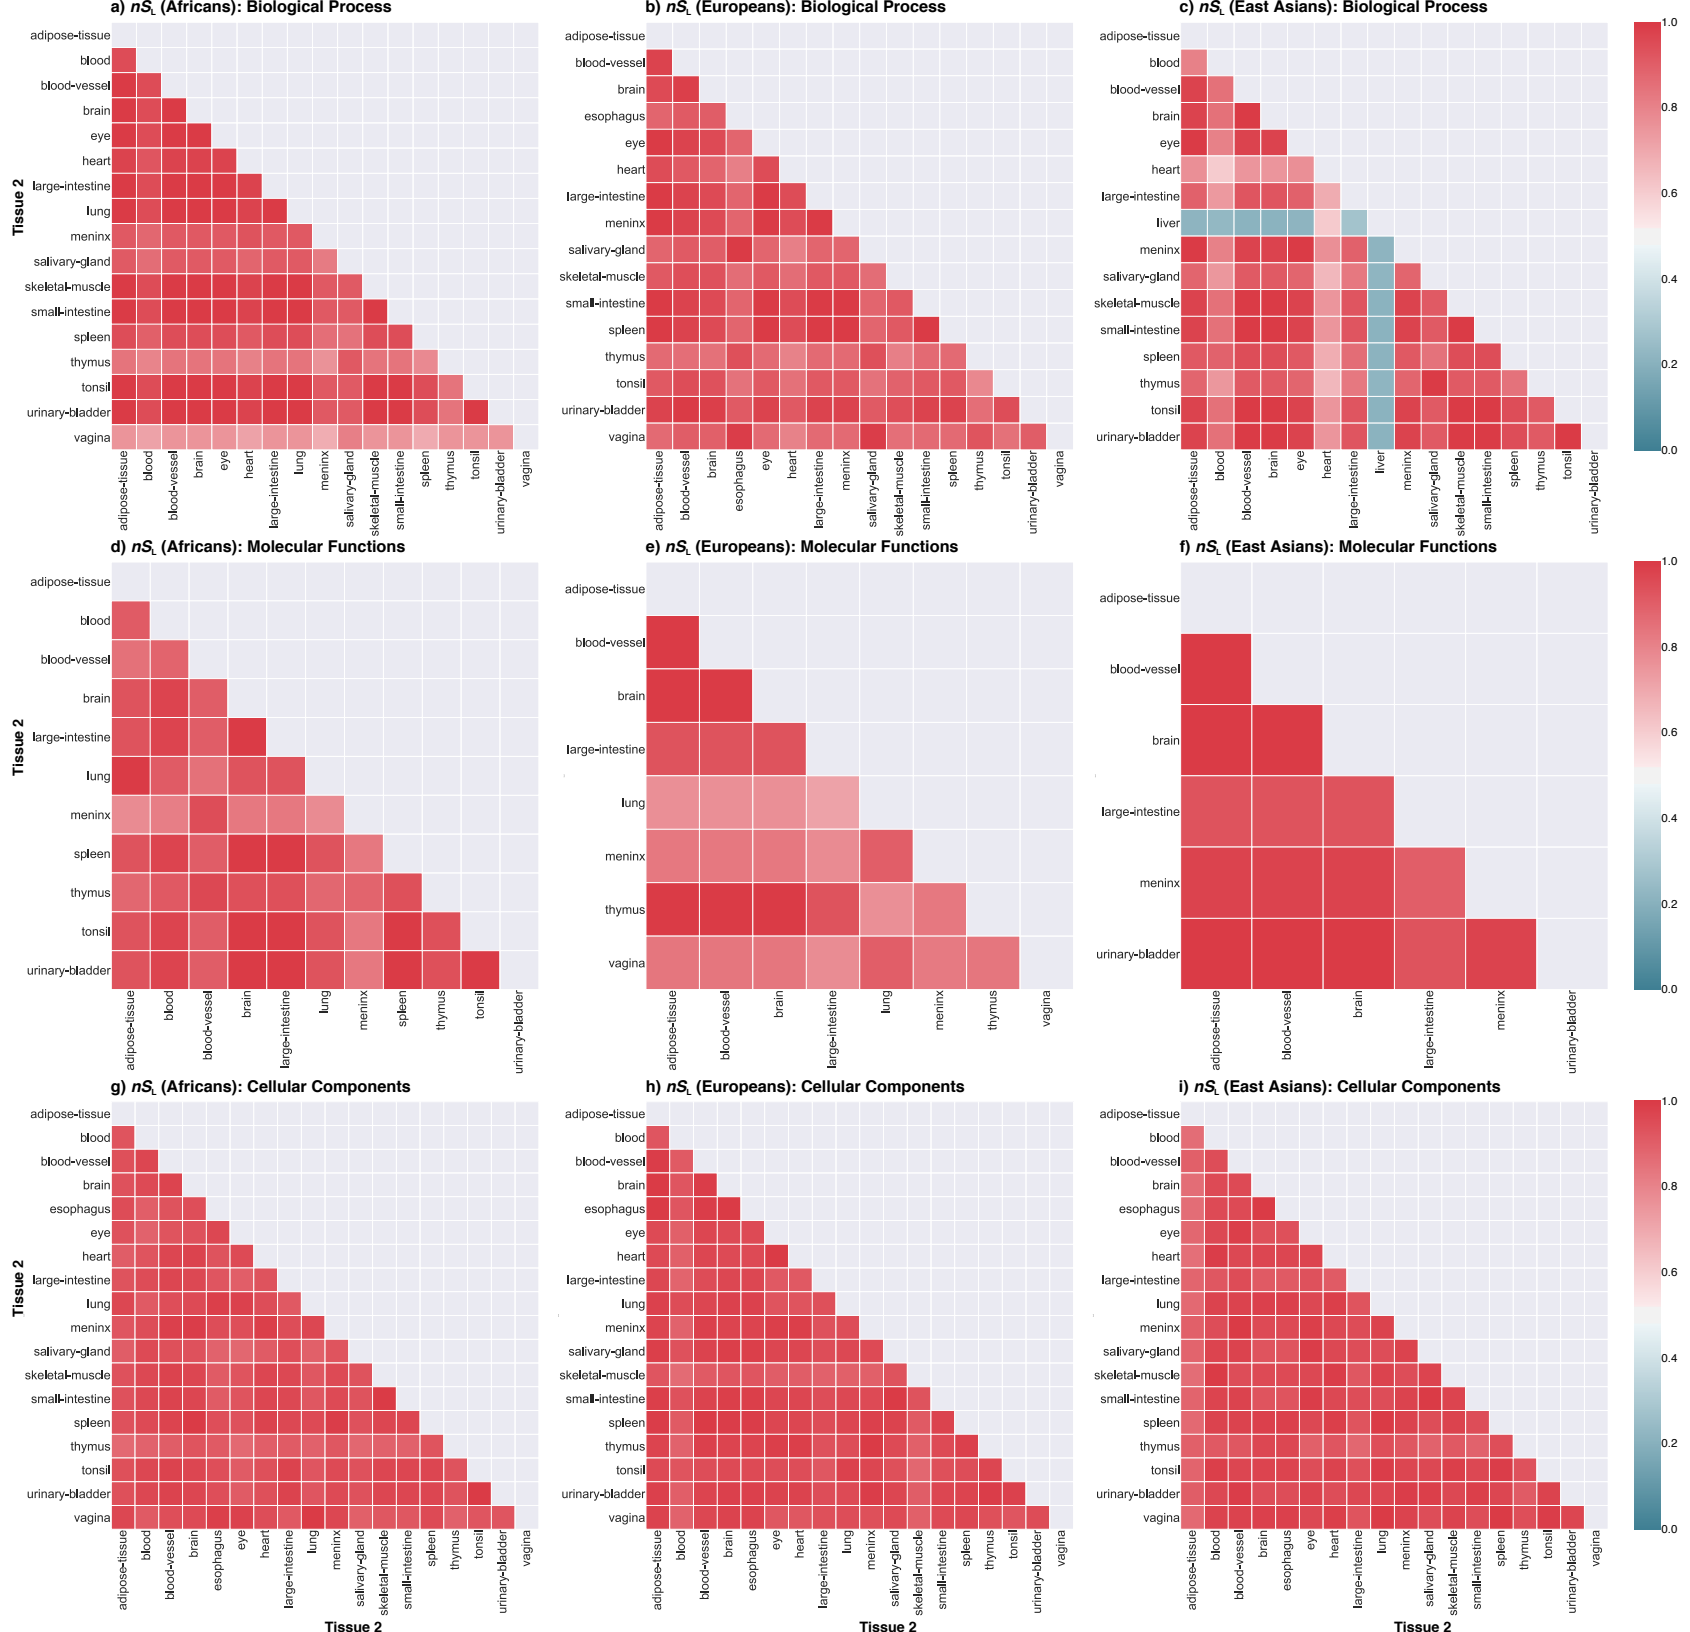

Supplement: Supplementary file 9 [file 1]

Figure S7

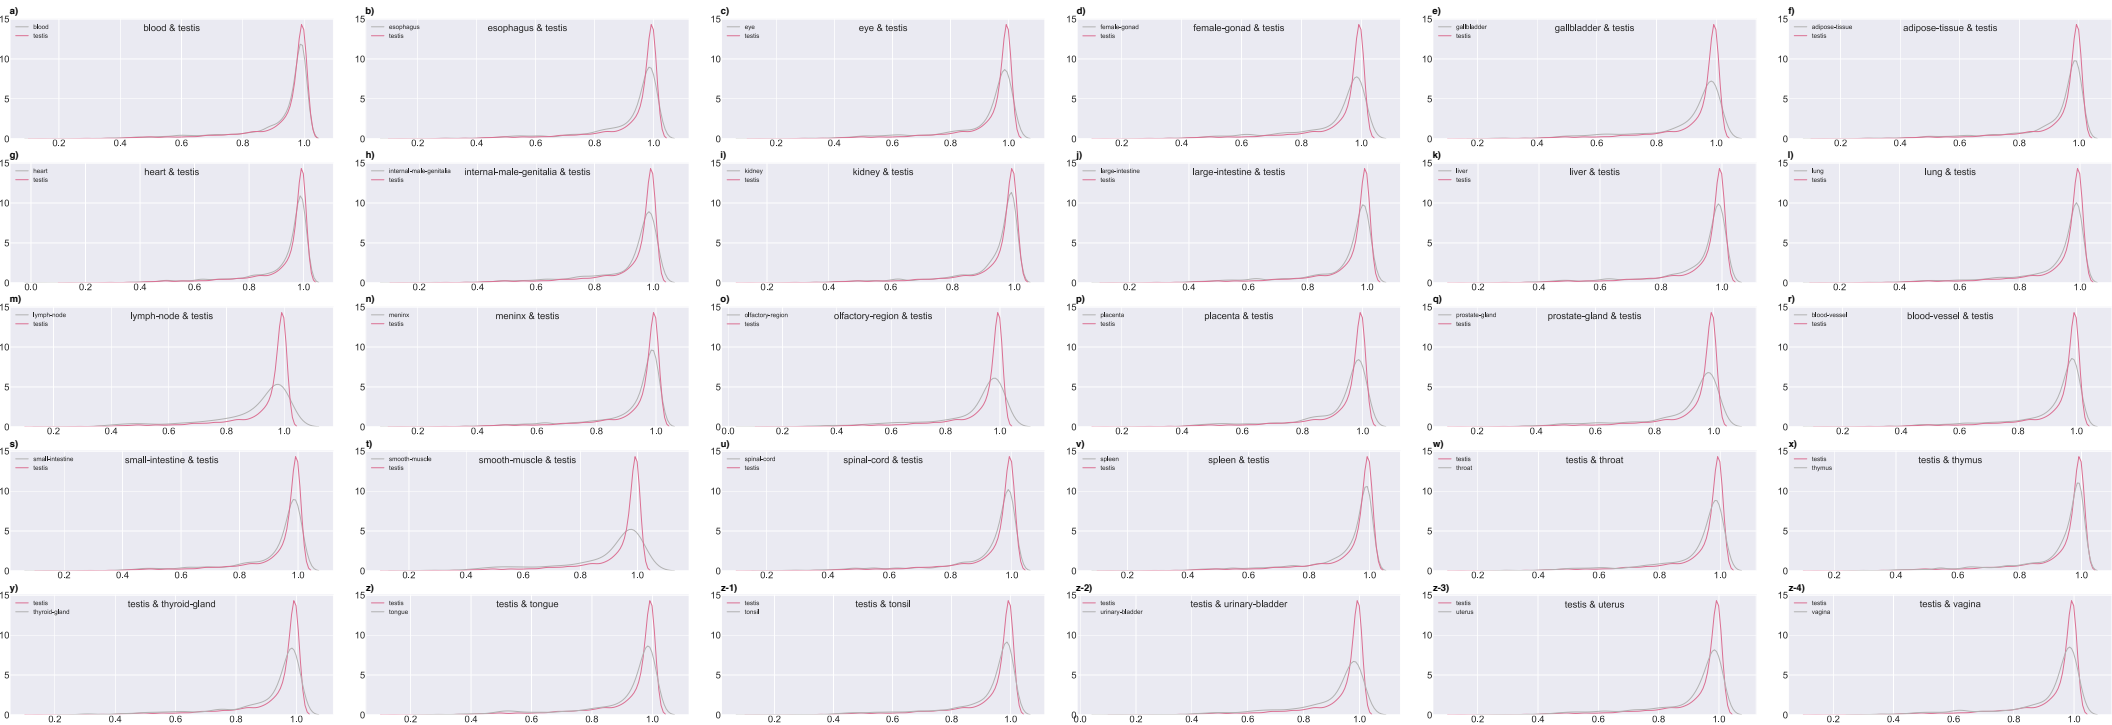

Supplement: Supplementary file 10 [file 1]

Figure S6

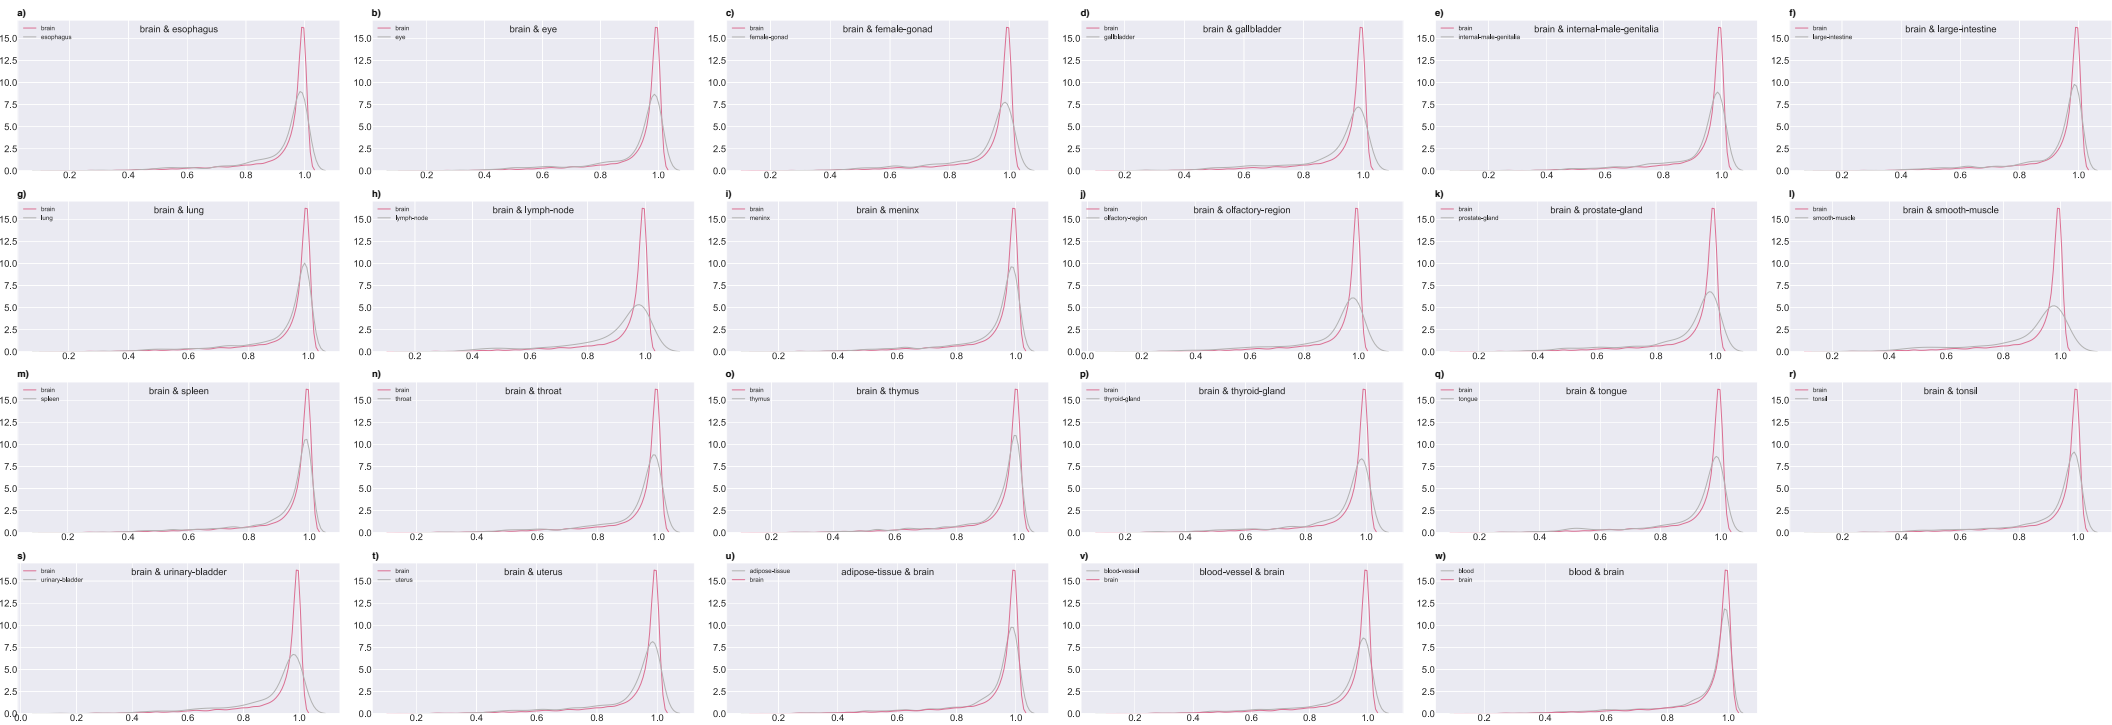

Supplement: Supplementary file 11 [file 1]

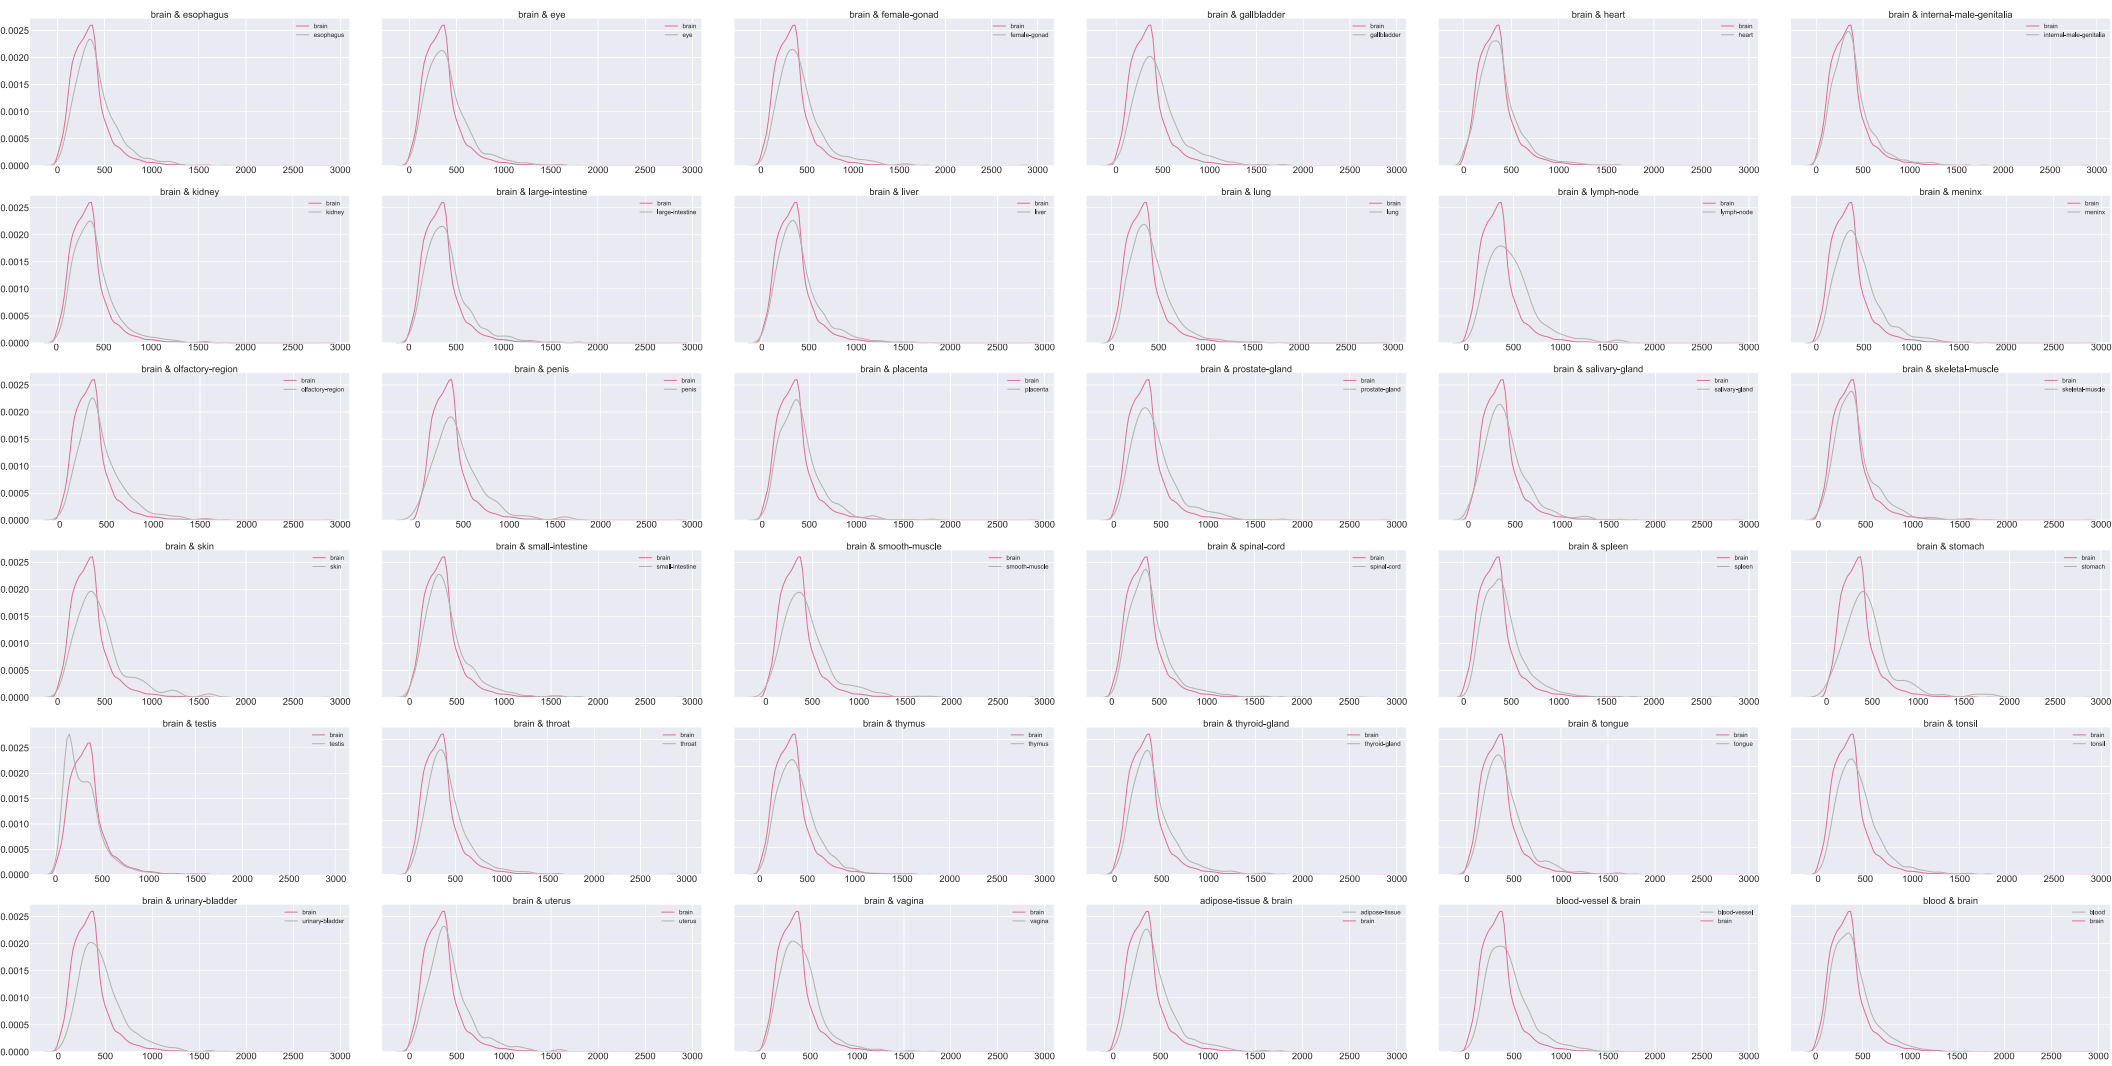

Supplement: Supplementary file 12 [file 1]

Figure S4

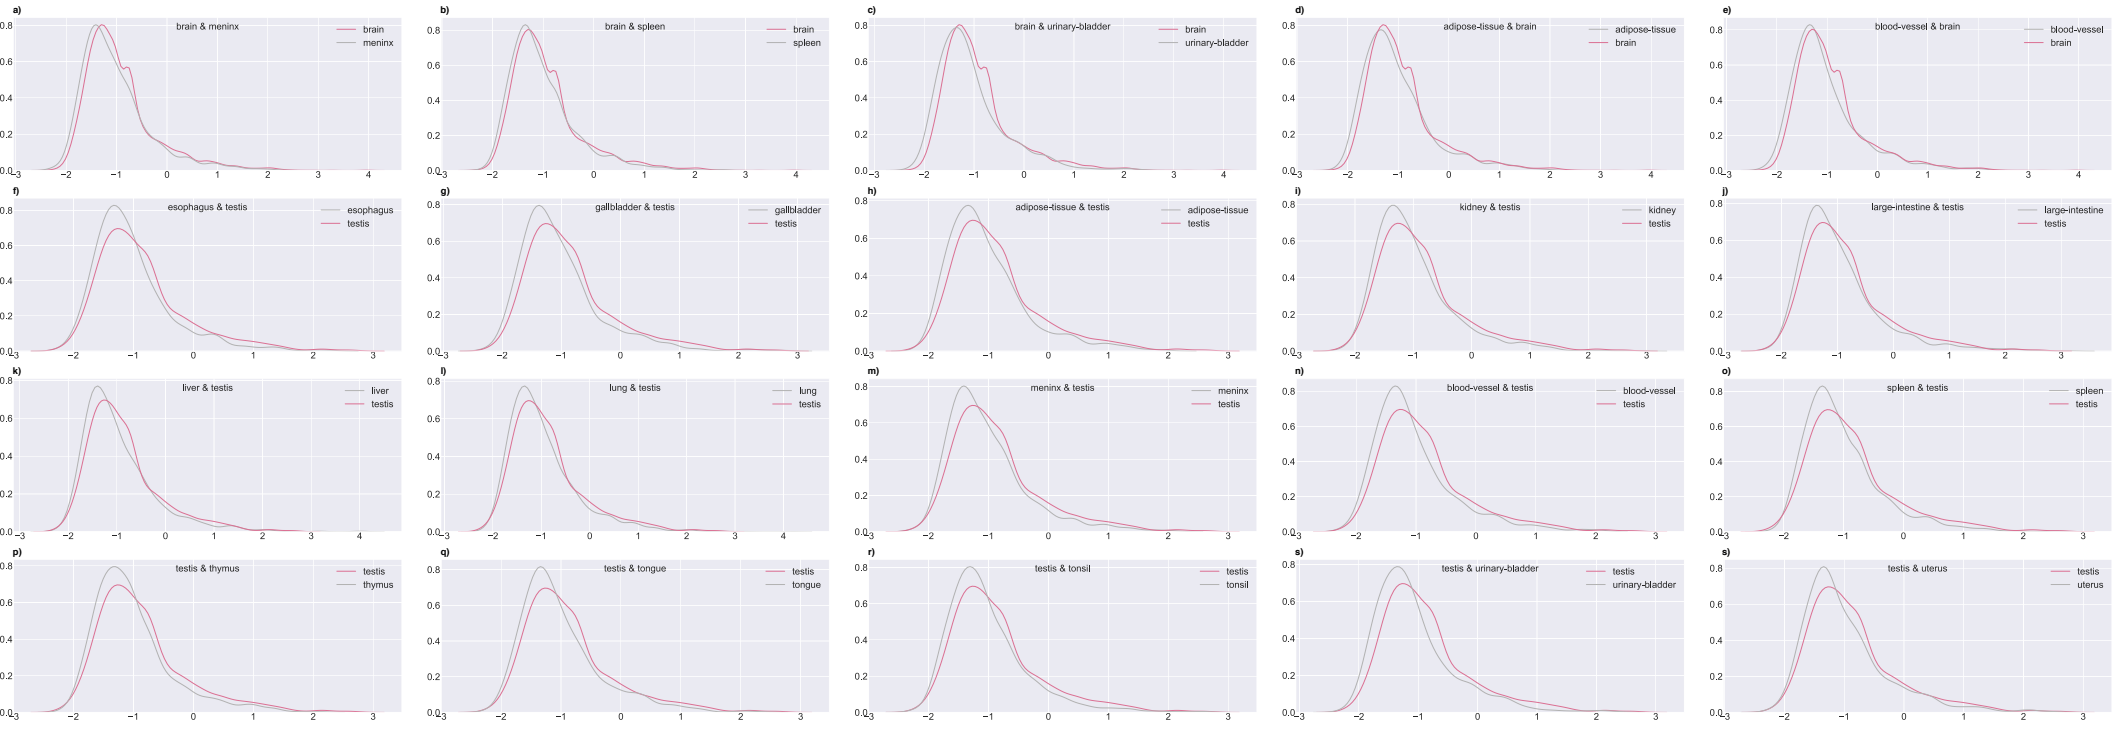

Supplement: Supplementary file 13 [file 1]

Figure S15

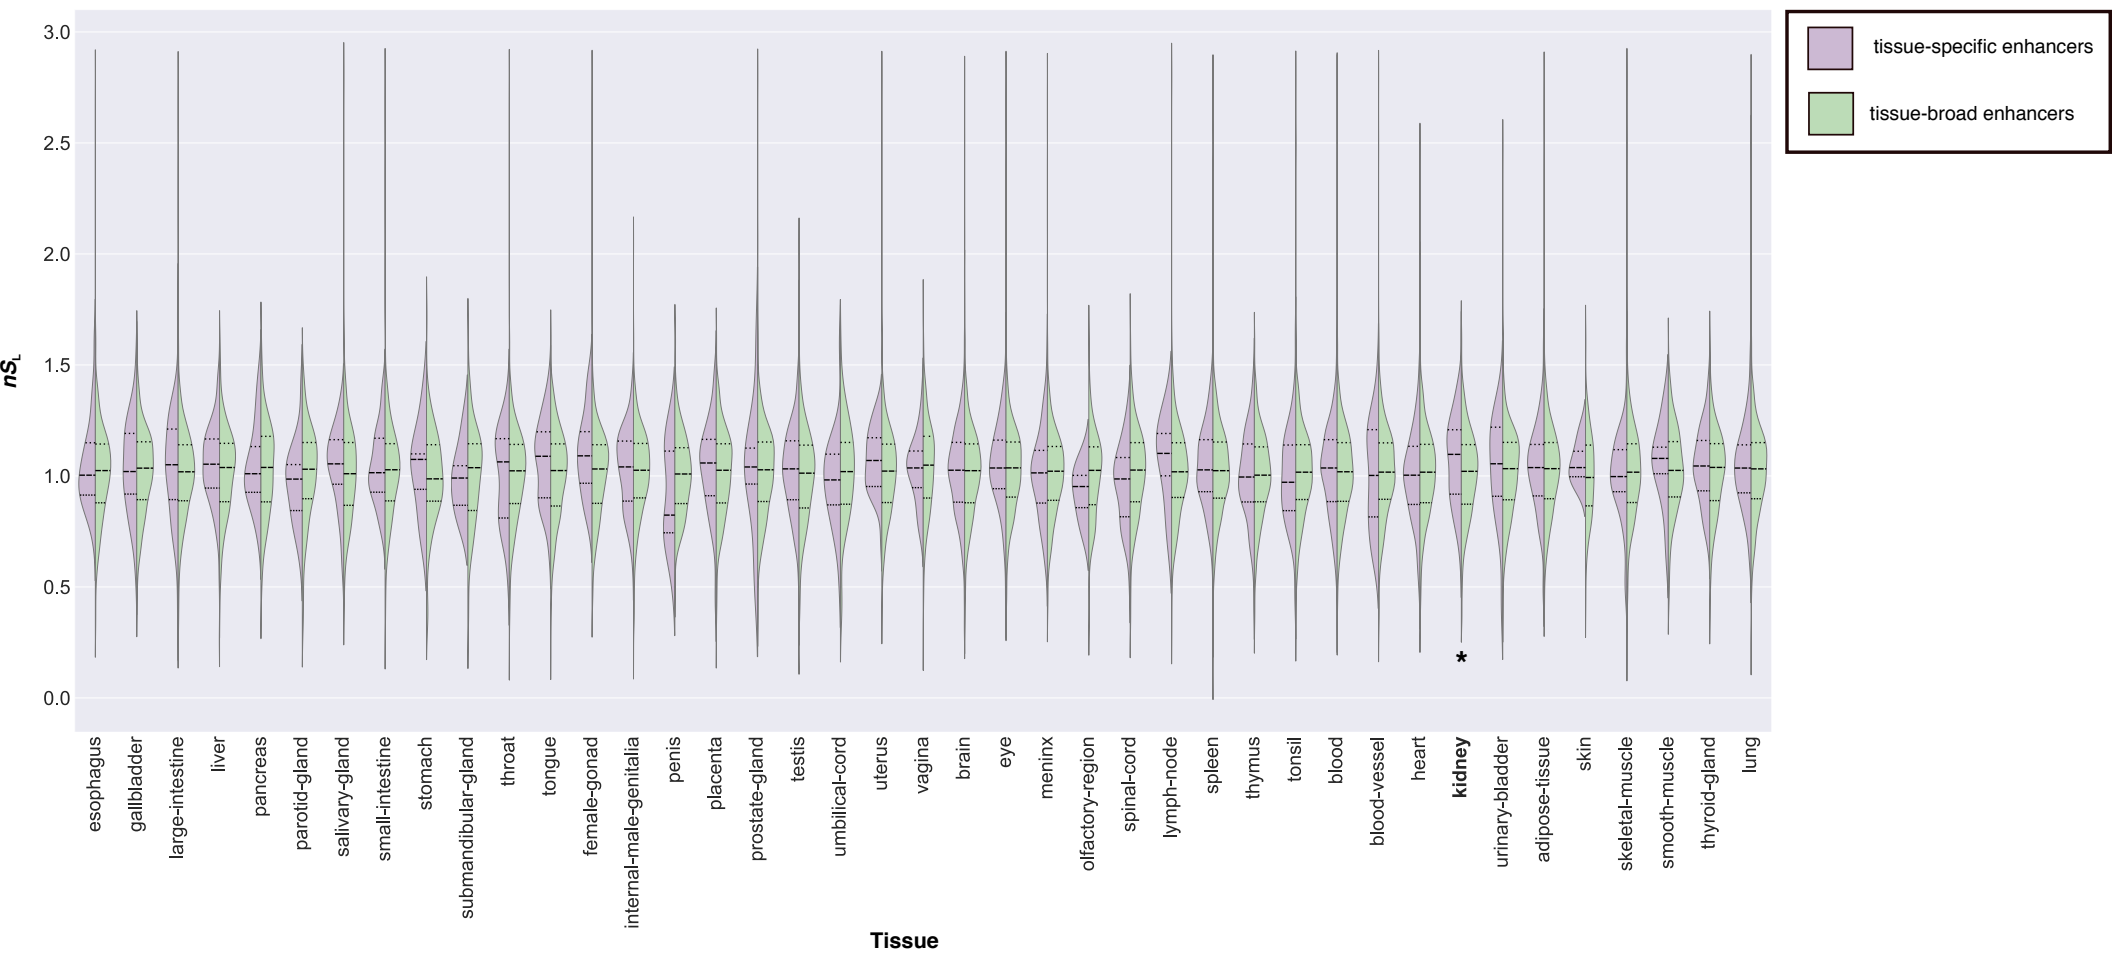

Supplement: Supplementary file 14 [file 1]

Figure S11

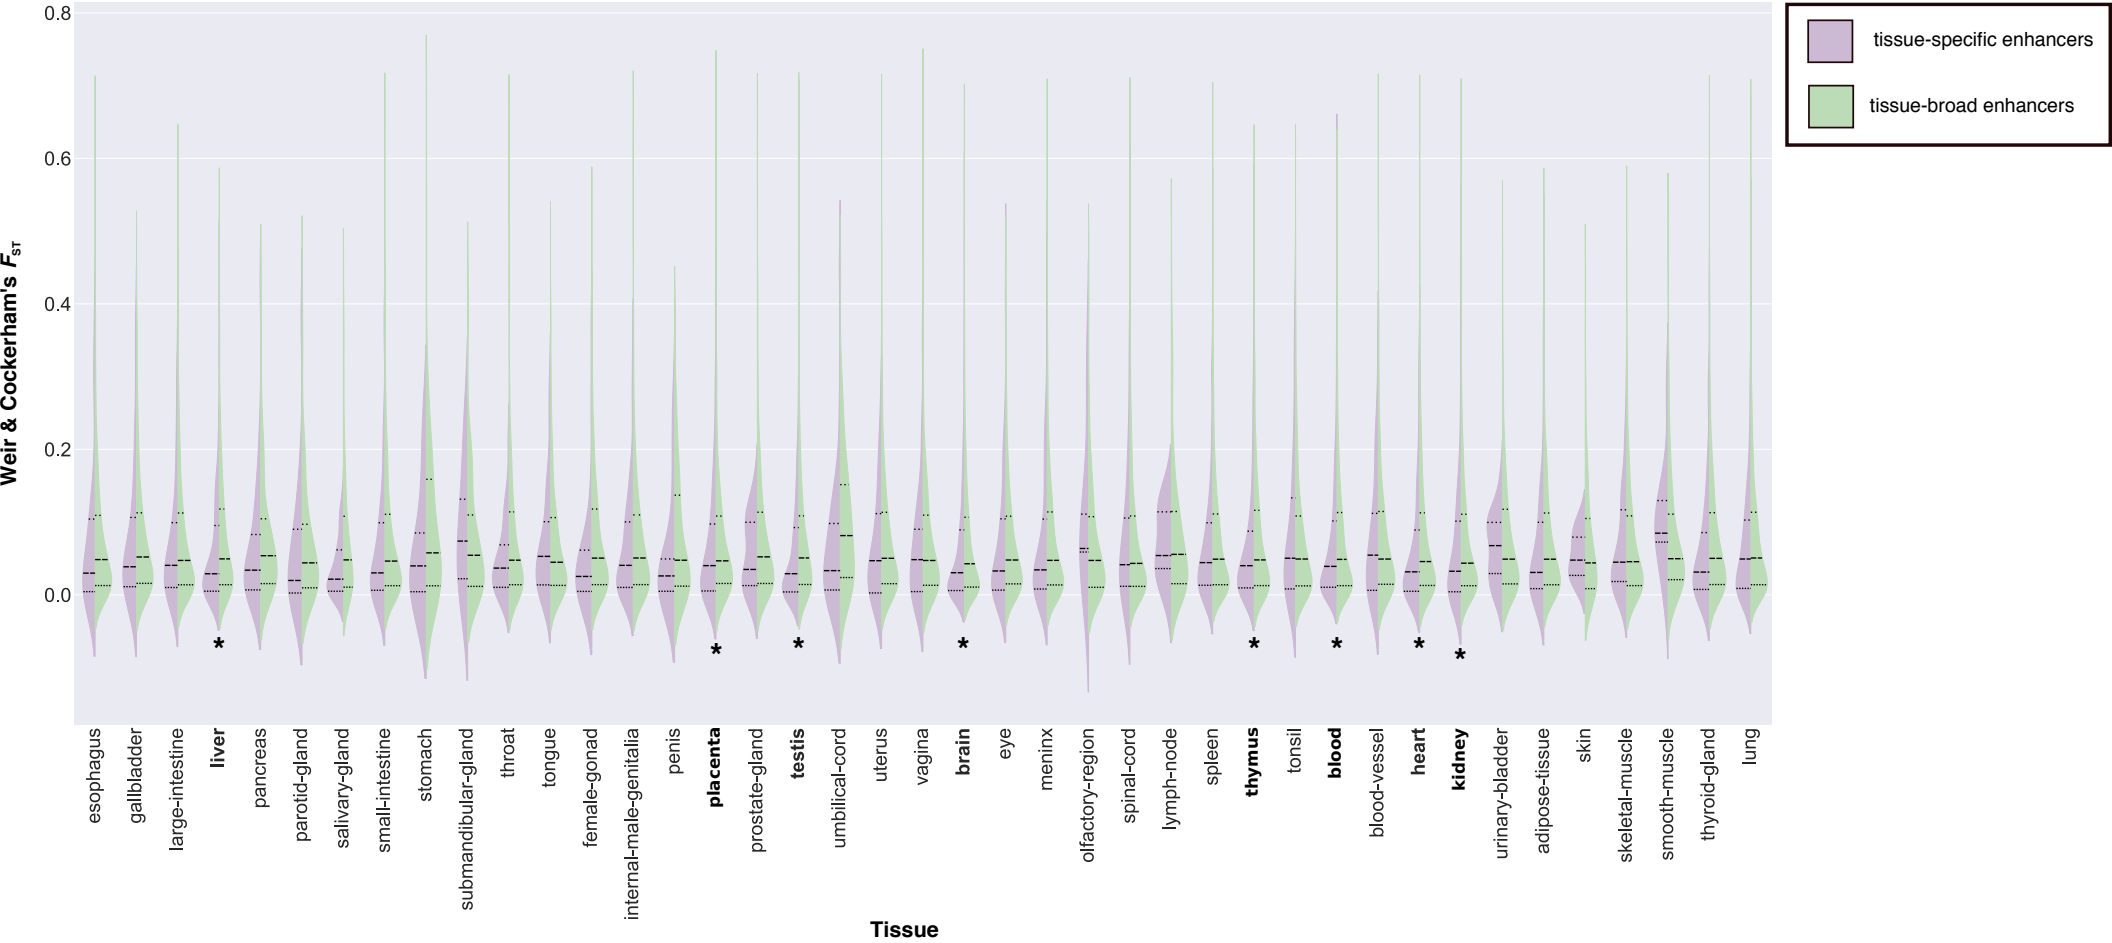

Supplement: Supplementary file 15 [file 1]

Figure S8

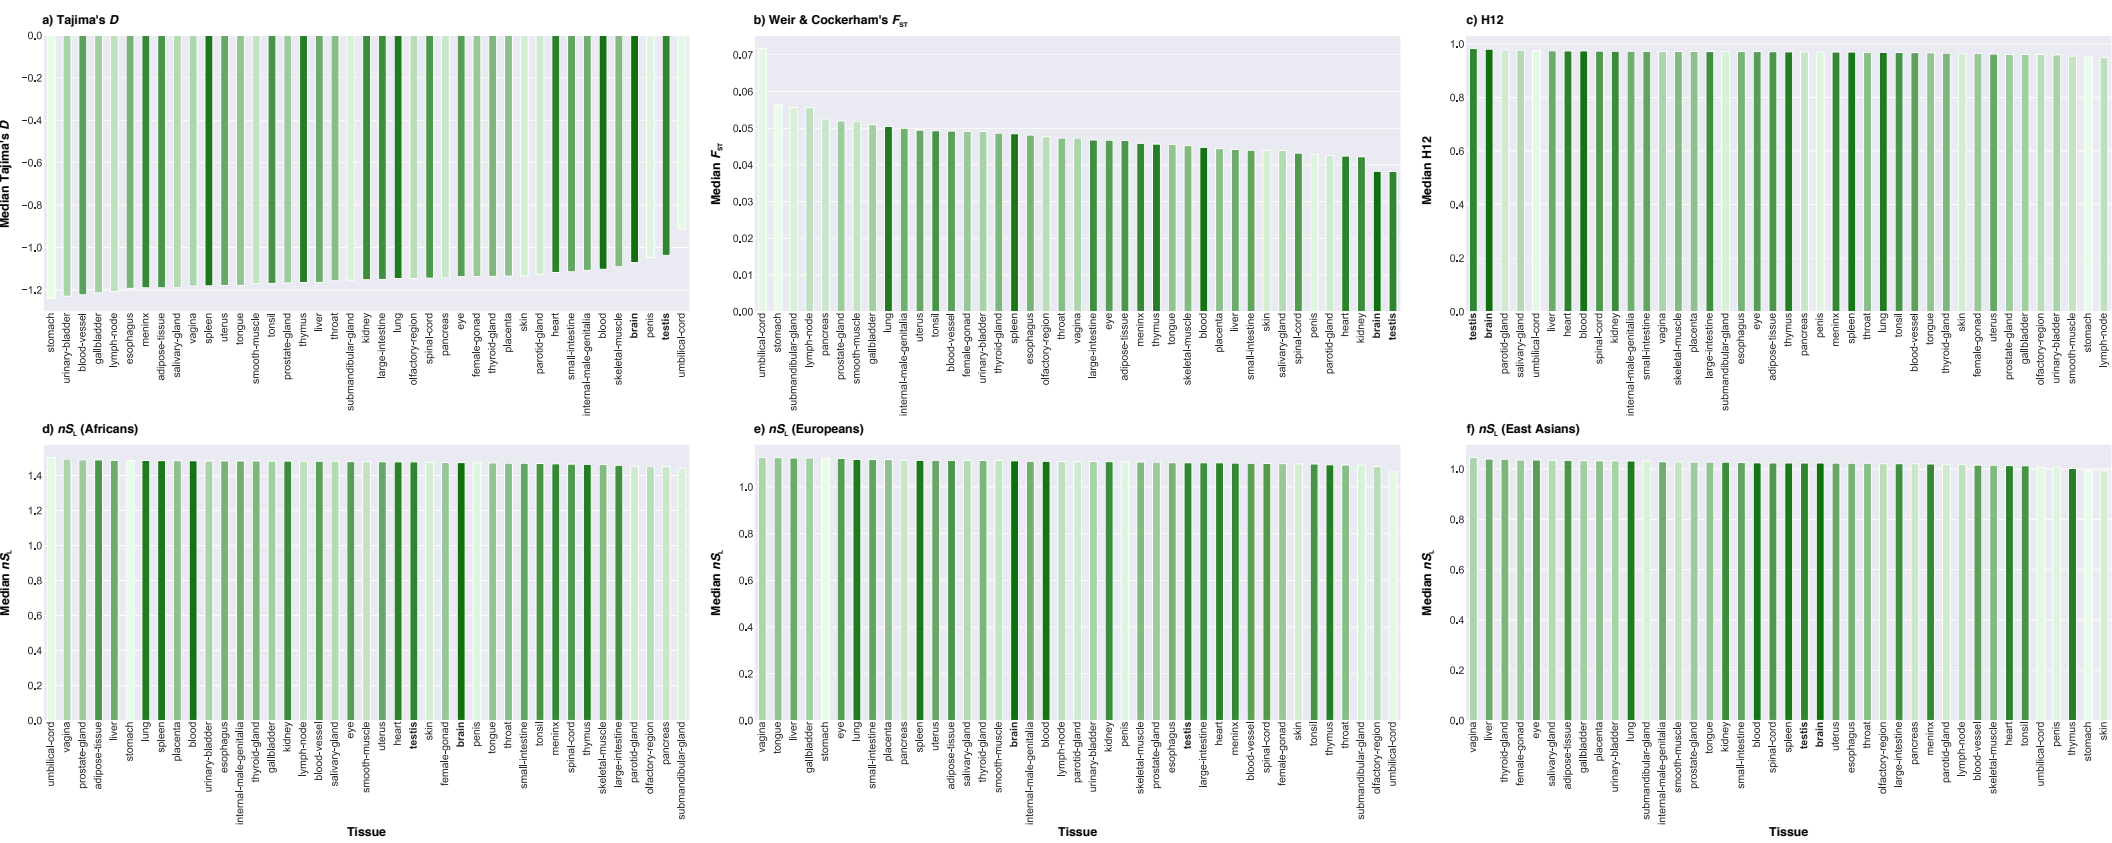

Supplement: Supplementary file 16 [file 1]

Figure S3

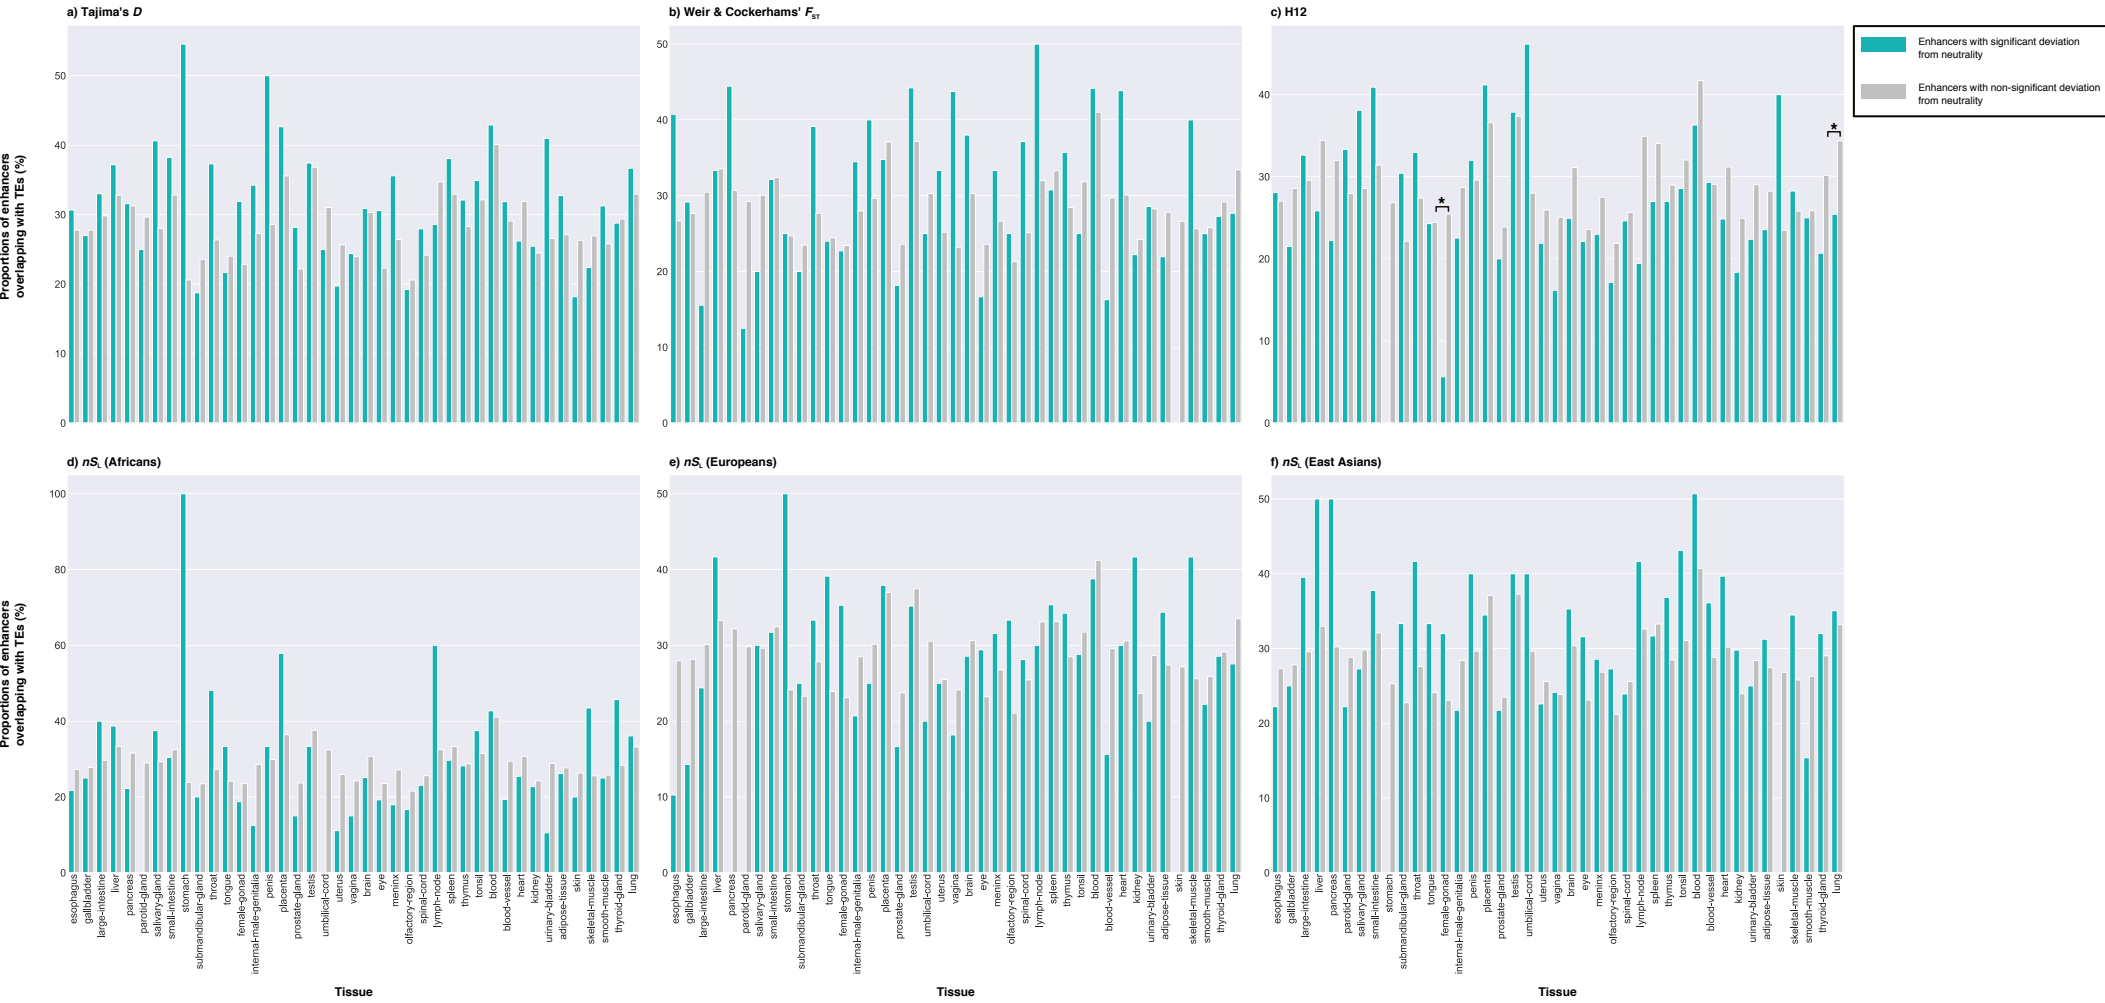

Supplement: Supplementary file 17 [file 1]
